# Supplementary material for: Exploring Text Mining for Recent Consumer and Sensory Studies about Alternative Proteins
Source: MDPI journal article supplement (doi:10.3390/foods10112537), 2021-10-21
Supplement: s1 [file s1]

**Table S1.** The list of scientific reports analyzed by the Natural Language Processing

| Number | Title                                                                                                                                                                         | Journal                            | Authors/year                 |
|--------|-------------------------------------------------------------------------------------------------------------------------------------------------------------------------------|------------------------------------|------------------------------|
| 1      | Role of Sensory Evaluation in Consumer Acceptance of Plant-Based Meat Analogs and Meat Extenders: A Scoping Review                                                            | <i>Food</i>                        | Fiorentini et al. (2020)     |
| 2      | Drivers and Inhibitors in the Acceptance of Meat Alternatives: The Case of Plant and Insect-Based Proteins                                                                    | <i>Food</i>                        | De Koning et al. (2020)      |
| 3      | Nutritional, Microbial, and Sensory Evaluation of Complementary Foods Made from Blends of Orange-Fleshed Sweet Potato and Edible Insects                                      | <i>Food</i>                        | Agbemaflle et al. (2020)     |
| 4      | Impact of Fermentation and Phytase Treatment of Pea-Oat Protein Blend on Physicochemical, Sensory, and Nutritional Properties of Extruded Meat Analogs                        | <i>Food</i>                        | Kaleda et al. (2020)         |
| 5      | Physicochemical Properties and Consumer Acceptance of Bread Enriched with Alternative Proteins                                                                                | <i>Food</i>                        | García-Segovia et al. (2020) |
| 6      | Meat Quality Derived from High Inclusion of a Micro-Alga or Insect Meal as an Alternative Protein Source in Poultry Diets: A Pilot Study                                      | <i>Food</i>                        | Altmann et al. (2018)        |
| 7      | Consumer perceptions of conventional and alternative protein sources: A mixed-methods approach with meal and product framing                                                  | <i>Appetite</i>                    | Possidónio et al. (2021)     |
| 8      | School children cooking and eating insects as part of a teaching program - Effects of cooking, insect type, tasting order and food neophobia on hedonic response              | <i>Food Quality and Preference</i> | Chow et al. (2021)           |
| 9      | Importance of additional information, as a complement to information coming from packaging, to promote meat substitutes: A case study on a sausage based on vegetable protein | <i>Food Quality and Preference</i> | Martin et al. (2021)         |
| 10     | Structuring the meat analogue by using plant-based derived composites                                                                                                         | <i>Journal of Food Engineering</i> | Yuliarti et al. (2021)       |

|    |                                                                                                                                                                                                              |                                                             |                       |
|----|--------------------------------------------------------------------------------------------------------------------------------------------------------------------------------------------------------------|-------------------------------------------------------------|-----------------------|
| 11 | Effects of Maillard-reacted beef bone hydrolysate on the physicochemical properties of extruded meat alternatives                                                                                            | <i>Journal of Food Science</i>                              | Chiang et al. (2020)  |
| 12 | Edible mushroom mycelia of <i>Pleurotus sapidus</i> as novel protein sources in a vegan boiled sausage analog system: functionality and sensory tests in comparison to commercial proteins and meat sausages | <i>European Food Research and Technology</i>                | Stephan et al. (2018) |
| 13 | Towards more sustainable meat alternatives: How technical parameters affect the sensory properties of extrusion products derived from soy and algae                                                          | <i>Cleaner Production</i>                                   | Grahl et al. (2018)   |
| 14 | Block protocol for conventional profiling to sensory characterise plant protein isolates                                                                                                                     | <i>Food Quality and Preference</i>                          | Cosson et al. (2020)  |
| 15 | Alternative protein sources in Western diets: Food product development and consumer acceptance of spirulina-filled pasta                                                                                     | <i>Food Quality and Preference</i>                          | Grahl et al. (2020)   |
| 16 | Older Consumers' Readiness to Accept Alternative, More Sustainable Protein Sources in the European Union                                                                                                     | <i>Nutrients</i>                                            | Grasso et al. (2019)  |
| 17 | Plant protein-based alternatives of reconstructed meat: Science, technology, and challenges                                                                                                                  | <i>Trends in Food Science and Technology</i>                | Sha & Xiong (2020)    |
| 18 | Product appropriateness, willingness to try and perceived risks of foods containing insect protein powder: A survey of US consumers                                                                          | <i>International Journal of Food Science and Technology</i> | Ardoin et al. (2020)  |
| 19 | Partial and total replacement of meat by plant-based proteins in chicken sausage: evaluation of mechanical, physico-chemical and sensory characteristics                                                     | <i>Journal of Food Science and Technology</i>               | Kamani et al. (2019)  |
| 20 | Sensory attributes of edible insects and insect-based foods - Future outlooks for enhancing consumer appeal                                                                                                  | <i>Trends in Food Science and Technology</i>                | Mishyna et al. (2020) |

**Supplementary File S1.** PDF document text mining codes and explanation produced by Cristhiam Gurdian

```
#' ---
#' title: Text mining trial
#' author: Cristhiam Gurdian (cgurdi3@lsu.edu)
#' date: 2021-January-06
#' ---

install.packages("pdftools")
library(pdftools)
#set working directory to the folder that contains
the pdf files
#remove from the pdf names greek characters or
symbols because the lapply function will not work with
those

#create a vector of PDF file names using the
list.files function.
#The pattern argument says to only grab those files
ending with "pdf":
files <- list.files(pattern = "pdf$")#only works
if you have your working directory set to the folder
where you downloaded the PDF files
files #The "files" vector contains all the PDF file
names. we'll use this vector to automate the process
of reading in the text of the PDF files.

#The pdftools function for extracting text is
pdf_text.
#Using the lapply function, we can apply the
pdf_text function to each element in the "files" vector
and create an object called "text".

text <- lapply(files, pdf_text) #This creates a
list object with three elements, one for each document.
length(text)
#Each element in "text" is a vector that contains
the text of the PDF file.
lapply(text, length) #The length of each vector
corresponds to the number of pages in the PDF file.

####USING TEXT MINING PACKAGE FOR TEXT ANALYSIS
#First load tm package and then create a corpus,
which is a database for text.
#instead of working with the "opinions" text"
object we created earlier, we start over.

install.packages("tm")
library(tm)
corp <- Corpus(URISource(files),
               readerControl = list(reader =
readPDF))#The Corpus function creates a corpus. The
first argument to Corpus is what we want to use to
create the corpus.
#In this case, it's the vector of PDF files. To do
this, we use the URISource function to indicate that
the files vector is a URI (Uniform Resource Identifier)
source.
# we're telling the Corpus function that the vector
of file names identifies our resources.
#The second argument, readerControl, tells Corpus
which reader to use to read in the text from the PDF
files (readPDF, a tm function).
#The readerControl argument requires a list of
control parameters, one of which is reader, so we enter
list(reader = readPDF).
#Finally we save the result to an object called
"corp".
```

#Now that we have a corpus, we can create a term-document matrix, (TDM) that stores counts of terms for each document.

#The tm package provides a function to create a TDM called TermDocumentMatrix.

```
library(SnowballC)
text.tdm <- TermDocumentMatrix(corp,
                                control =
list(removePunctuation = TRUE,
stopwords = TRUE,
= TRUE,
stemming = TRUE,
removeNumbers = TRUE,
                                bounds
= list(global = c(3, Inf))))
#The first argument is our corpus. The second
argument is a list of control parameters.
#clean up the corpus before creating the TDM.
Remove punctuation, stopwords (eg, the, of, in, etc.),
convert text to lower case, stem the words,
#remove numbers, and only count words that appear
at least 3 times. We save the result to an object
called "text.tdm".
```

```
inspect(text.tdm[1:10,])#first 10 terms
```

#pdf\_text function may preserve the unicode curly-quotes and em-dashes used in the PDF files.

#manually use the removePunctuation function with tm\_map, both functions in the tm package.

#removePunctuation function has an argument called ucp that when set to TRUE will look for unicode punctuation.

corp <- tm\_map(corp, removePunctuation, ucp = TRUE)  
#re-create the TDM, this time without the  
removePunctuation = TRUE argument.

```
text.tdm <- TermDocumentMatrix(corp,
                                control =
list(stopwords = TRUE,
                                tolower
= TRUE,
stemming = TRUE,
removeNumbers = TRUE,
                                bounds
= list(global = c(3, Inf))))
inspect(text.tdm[1:10,])#first 10 terms
```

#findFreqTerms function to find words that occur at least 100 times:

```
findFreqTerms(text.tdm, lowfreq = 100, highfreq = Inf)
```

#To see the counts of those words we could save the result and use it to subset the TDM.

#we have to use as.matrix to see the print out of the subsetted TDM.

```
ft <- findFreqTerms(text.tdm, lowfreq = 100,
highfreq = Inf)
as.matrix(text.tdm[ft,])
```

#To see the words

```
ft.tdm <- as.matrix(text.tdm[ft,])
sort(apply(ft.tdm, 1, sum), decreasing = TRUE)
```

**Supplementary File S2.** Text (TXT) document mining codes obtained from <https://www.red-gate.com/simple-talk/sql/bi/text-mining-and-sentiment-analysis-with-r/>

```
library("SnowballC")
library("RColorBrewer")
library("wordcloud")
library("syuzhet")
library("ggplot2")
library("tm")

text <- readLines(file.choose())
TextDoc <- Corpus(VectorSource(text))

toSpace <- content_transformer(function (x ,
pattern ) gsub(pattern, " ", x))
TextDoc <- tm_map(TextDoc, toSpace, "/")
TextDoc <- tm_map(TextDoc, toSpace, "@")
TextDoc <- tm_map(TextDoc, toSpace, "\\|")

TextDoc <- tm_map(TextDoc,
content_transformer(tolower))
TextDoc <- tm_map(TextDoc, removeNumbers)
TextDoc <- tm_map(TextDoc, removewords,
stopwords("english"))
TextDoc <- tm_map(TextDoc, removewords, c("s",
"company", "team"))
TextDoc <- tm_map(TextDoc, removePunctuation)
TextDoc <- tm_map(TextDoc, stripWhitespace)
TextDoc <- tm_map(TextDoc, stemDocument)

TextDoc_dtm <- TermDocumentMatrix(TextDoc)
dtm_m <- as.matrix(TextDoc_dtm)
dtm_v <- sort(rowSums(dtm_m),decreasing=TRUE)
dtm_d <- data.frame(word =
names(dtm_v),freq=dtm_v)
head(dtm_d, 50)

barplot(dtm_d[1:50,]$freq, las = 2, names.arg =
dtm_d[1:50,]$word,
col = "lightgreen", main = "Top 50 most
frequent words",
ylab = "word frequencies")

set.seed(1234)
wordcloud(words = dtm_d$word, freq = dtm_d$freq,
min.freq = 5,
max.words=100, random.order=FALSE,
rot.per=0.40,
colors=brewer.pal(8, "Dark2"))

findAssocs(TextDoc_dtm, terms =
c("insect","flavor","like"), corlimit = 0.25)

syuzhet_vector <- get_sentiment(text,
method="syuzhet")
head(syuzhet_vector)
summary(syuzhet_vector)

bing_vector <- get_sentiment(text, method="bing")
head(bing_vector)
summary(bing_vector)

afinn_vector <- get_sentiment(text,
method="afinn")
head(afinn_vector)
summary(afinn_vector)

d<-get_nrc_sentiment(text)
td<-data.frame(t(d))
td_new <- data.frame(rowSums(td[2:253]))
```

```

names(td_new)[1] <- "count"
td_new <- cbind("sentiment" = rownames(td_new),
td_new)
rownames(td_new) <- NULL
td_new2<-td_new[1:8,]
quickplot(sentiment, data=td_new2, weight=count,
geom="bar", fill=sentiment,
ylab="count")+ggtitle("Survey sentiments")

barplot(
sort(colSums(prop.table(d[, 1:8]))),
horiz = TRUE,
cex.names = 0.7,
las = 1,
main = "Emotions in Text", xlab="Percentage"
)

```

**Table S2.** The frequency of words in the text matrix (top 50)

| Word      | Frequency | Word      | Frequency |
|-----------|-----------|-----------|-----------|
| Meat      | 531       | Plantbas  | 97        |
| Protein   | 432       | Also      | 96        |
| Product   | 404       | Sourc     | 96        |
| Food      | 356       | Compar    | 85        |
| Consum    | 264       | Tabl      | 84        |
| Altern    | 188       | Expect    | 83        |
| Studi     | 181       | Content   | 82        |
| Insect    | 179       | Pea       | 82        |
| Tast      | 167       | Structure | 82        |
| Flavor    | 165       | Present   | 78        |
| Use       | 161       | Sustain   | 78        |
| Sensori   | 154       | Howev     | 77        |
| Textur    | 142       | Mrp       | 77        |
| Differ    | 141       | High      | 76        |
| Attribute | 136       | Spirulina | 76        |
| Can       | 128       | Posit     | 73        |
| Accept    | 124       | Addit     | 73        |
| Sampl     | 121       | Mayb      | 71        |
| Increase  | 116       | Process   | 71        |
| Effect    | 111       | Develop   | 69        |
| Like      | 110       | Show      | 69        |
| Result    | 107       | Analogu   | 68        |
| Evalua    | 105       | Plant     | 67        |
| Signific  | 100       | Subsitut  | 67        |

### Supplementary File S3. The relevance (association levels) between keywords and other words

|            |            |            |           |             |             |            |            |             |          |
|------------|------------|------------|-----------|-------------|-------------|------------|------------|-------------|----------|
| \$meat     |            |            |           |             |             |            |            |             |          |
| altern     | product    | substitut  | labgrown  | barrier     | lack        | use        | addit      | skill       |          |
| 0.62       | 0.51       | 0.50       | 0.44      | 0.42        | 0.37        | 0.36       | 0.36       | 0.36        |          |
| consumpt   | process    | red        | studi     | includ      | reduc       | analog     | one        | way         |          |
| 0.35       | 0.35       | 0.34       | 0.34      | 0.34        | 0.34        | 0.33       | 0.33       | 0.33        |          |
| diet       | clean      | can        | toward    | concentr    | meal        | graea      | bryant     | also        |          |
| 0.33       | 0.32       | 0.31       | 0.31      | 0.30        | 0.30        | 0.30       | 0.30       | 0.29        |          |
| term       | particip   | due        | benefit   | environment | address     | chang      | impact     | may         |          |
| 0.29       | 0.29       | 0.29       | 0.29      | 0.29        | 0.29        | 0.28       | 0.28       | 0.28        |          |
| contain    | help       | lower      | tofu      | animalfre   | enjoy       | monik      | pose       | unfa        |          |
| 0.28       | 0.28       | 0.28       | 0.28      | 0.28        | 0.28        | 0.28       | 0.28       | 0.28        |          |
| assess     | mrp        | natur      | fish      | organ       | seitan      | frame      | attract    | perceiv     |          |
| 0.27       | 0.27       | 0.27       | 0.27      | 0.27        | 0.27        | 0.27       | 0.27       | 0.26        |          |
| compar     | differ     | ingredi    | replac    | behavior    | label       | hoek       | improv     | nutrit      |          |
| 0.26       | 0.26       | 0.26       | 0.26      | 0.26        | 0.26        | 0.26       | 0.25       | 0.25        |          |
| research   | percept    | siegrist   | white     | mimic       |             |            |            |             |          |
| 0.25       | 0.25       | 0.25       | 0.25      | 0.25        |             |            |            |             |          |
| \$protein  |            |            |           |             |             |            |            |             |          |
| sourc      | animalbas  | singlecel  | altern    | vitro       | structur    | found      | studi      | crosslink   |          |
| 0.60       | 0.41       | 0.41       | 0.40      | 0.40        | 0.39        | 0.38       | 0.37       | 0.37        |          |
| extent     | gluten     | dont       | use       | wheat       | environment | contain    | dairi      | various     |          |
| 0.37       | 0.36       | 0.35       | 0.34      | 0.34        | 0.34        | 0.33       | 0.33       | 0.33        |          |
| product    | without    | fibrous    | belgium   | process     | intak       | seafoodbas | consist    | techniqu    |          |
| 0.31       | 0.31       | 0.31       | 0.31      | 0.30        | 0.30        | 0.30       | 0.29       | 0.29        |          |
| although   | freez      | lin        | meatbas   | deriv       | grasp       | salad      | student    | develop     |          |
| 0.29       | 0.29       | 0.29       | 0.29      | 0.29        | 0.29        | 0.29       | 0.29       | 0.28        |          |
| properti   | uniqu      | major      | know      | egg         | nutrit      | sustain    | due        | research    |          |
| 0.28       | 0.28       | 0.28       | 0.28      | 0.28        | 0.27        | 0.27       | 0.27       | 0.27        |          |
| wide       | viscoelast | land       | eat       | analogu     | manner      | aquat      | biodivers  | businessusu |          |
| 0.27       | 0.27       | 0.27       | 0.27      | 0.27        | 0.27        | 0.27       | 0.27       | 0.27        |          |
| emiss      | freshwat   | ghge       | greenhous | nitrogen    | terrestri   | threaten   | chang      | impact      |          |
| 0.27       | 0.27       | 0.27       | 0.27      | 0.27        | 0.27        | 0.27       | 0.26       | 0.26        |          |
| also       | form       | total      | muscl     | requir      | furthermor  | meatlik    | manufactur | buffer      |          |
| 0.26       | 0.26       | 0.26       | 0.26      | 0.26        | 0.26        | 0.26       | 0.26       | 0.26        |          |
| solubil    | soy        | vari       | nugget    | ideal       | com         | agreement  | expand     | specul      |          |
| 0.26       | 0.25       | 0.25       | 0.25      | 0.25        | 0.25        | 0.25       | 0.25       | 0.25        |          |
| globular   | mung       |            |           |             |             |            |            |             |          |
| 0.25       | 0.25       |            |           |             |             |            |            |             |          |
| \$consum   |            |            |           |             |             |            |            |             |          |
| product    | research   | consumpt   | substitut | percept     | food        | studi      | barrier    | altern      | prefer   |
| 0.47       | 0.38       | 0.37       | 0.37      | 0.36        | 0.35        | 0.34       | 0.34       | 0.33        | 0.33     |
| specif     | market     | hoek       | may       | method      | identifi    | behavior   | pathway    | can         | way      |
| 0.33       | 0.31       | 0.31       | 0.30      | 0.30        | 0.30        | 0.30       | 0.30       | 0.29        | 0.29     |
| target     | qualit     | tri        | toward    | one         | howev       | find       | new        | develop     | impact   |
| 0.29       | 0.29       | 0.29       | 0.29      | 0.28        | 0.28        | 0.28       | 0.28       | 0.27        | 0.27     |
| suggest    | adopt      | understand | rather    | buy         | diet        | pasta      | dutch      | appeal      | approach |
| 0.27       | 0.27       | 0.27       | 0.27      | 0.27        | 0.27        | 0.27       | 0.27       | 0.26        | 0.26     |
| aim        | singl      | attitud    | mani      | academ      | freeli      | reliabl    | roininen   | alterna     | tive     |
| 0.26       | 0.26       | 0.26       | 0.26      | 0.26        | 0.26        | 0.26       | 0.26       | 0.26        | 0.26     |
| acknowl    | edg        | tailor     | wellknown | disappoint  | familiar    | test       | sourc      | willing     |          |
| 0.26       | 0.26       | 0.26       | 0.26      | 0.26        | 0.25        | 0.25       | 0.25       | 0.25        |          |
| \$insect   |            |            |           |             |             |            |            |             |          |
| ball       | oatmeal    | children   | food      | caparro     | edibl       | mealworm   | ashmor     | childhood   | dunlop   |
| 0.57       | 0.57       | 0.54       | 0.47      | 0.46        | 0.45        | 0.44       | 0.42       | 0.42        | 0.42     |
| familiaris | gust       | haidt      | hood      | mccauley    | medium      | realfood   | tinguish   | troduc      | rozin    |
| 0.42       | 0.42       | 0.42       | 0.42      | 0.42        | 0.42        | 0.42       | 0.42       | 0.42        | 0.40     |
| megido     | willing    | neophobia  | respons   | barbera     | selfcook    | may        | first      | recognis    | chitin   |
| 0.39       | 0.38       | 0.37       | 0.36      | 0.36        | 0.35        | 0.34       | 0.34       | 0.34        | 0.34     |
| choi       | tortilla   | grasshopp  | cite      | cockroach   | covari      | eli        | gmuer      | guth        | lensvelt |
| 0.34       | 0.34       | 0.34       | 0.34      | 0.34        | 0.34        | 0.34       | 0.34       | 0.34        | 0.34     |
| nuessli    | steenbekk  | ver        | hedon     | disgust     | tri         | novel      | might      | studi       | version  |
| 0.34       | 0.34       | 0.34       | 0.33      | 0.33        | 0.33        | 0.33       | 0.32       | 0.31        | 0.30     |
| bit        | author     | fao        | eat       | living      | visibl      | dis        | implic     | later       | second   |
| 0.29       | 0.29       | 0.29       | 0.29      | 0.29        | 0.29        | 0.29       | 0.29       | 0.29        | 0.28     |
| explor     | moder      | also       | rate      | previous    | stimuli     | belgian    | among      | influenc    | measur   |
| 0.28       | 0.28       | 0.27       | 0.27      | 0.27        | 0.27        | 0.27       | 0.26       | 0.26        | 0.26     |
| futur      | western    | matric     | chip      | encourag    | decosta     | continu    |            |             |          |
| 0.26       | 0.26       | 0.26       | 0.26      | 0.26        | 0.26        | 0.25       |            |             |          |



|                  |            |                  |             |                 |           |  |
|------------------|------------|------------------|-------------|-----------------|-----------|--|
| \$flavor         |            |                  |             |                 |           |  |
| mask             | lemonbasil | extrud           | lemon       | tomato          | spice     |  |
| 0.62             | 0.59       | 0.55             | 0.54        | 0.49            | 0.47      |  |
| vegetablebas     | content    | enhanc           | confound    | contentflavor   | dim       |  |
| 0.46             | 0.44       | 0.43             | 0.42        | 0.42            | 0.42      |  |
| equidist         | nonlinear  | smallest         | spir        | spirulinaextrud | tens      |  |
| 0.42             | 0.42       | 0.42             | 0.42        | 0.42            | 0.42      |  |
| ulina            | sampl      | beetging         | odor        | chickenflavor   | crablik   |  |
| 0.42             | 0.41       | 0.41             | 0.39        | 0.39            | 0.39      |  |
| katayama         | narrow     | oili             | oyster      | oysterlik       | shred     |  |
| 0.39             | 0.39       | 0.39             | 0.39        | 0.39            | 0.39      |  |
| shredshap        | shrimp     | strip            | stripshap   | volunt          | wilson    |  |
| 0.39             | 0.39       | 0.39             | 0.39        | 0.39            | 0.39      |  |
| basil            | complement | cuellarbermfadez | foreseen    | geosmin         | glutam    |  |
| 0.39             | 0.39       | 0.39             | 0.39        | 0.39            | 0.39      |  |
| methylisoborneol | mib        | milovanoviucu    | propriat    | spirulinarel    | steepest  |  |
| 0.39             | 0.39       | 0.39             | 0.39        | 0.39            | 0.39      |  |
| spici            | chicken    | control          | intens      | soybas          | beefbon   |  |
| 0.38             | 0.38       | 0.37             | 0.37        | 0.37            | 0.37      |  |
| unflavor         | pasta      | linear           | mustyearthi | meati           | four      |  |
| 0.37             | 0.37       | 0.37             | 0.36        | 0.35            | 0.35      |  |
| earthi           | aroma      | pepper           | bake        | salti           | shape     |  |
| 0.35             | 0.34       | 0.34             | 0.34        | 0.34            | 0.34      |  |
| compar           | season     | descript         | analog      | test            | beefi     |  |
| 0.33             | 0.33       | 0.33             | 0.32        | 0.32            | 0.32      |  |
| beeflik          | crush      | fortifi          | fullmeat    | grassi          | justright |  |
| 0.32             | 0.32       | 0.32             | 0.32        | 0.32            | 0.32      |  |
| modif            | pastri     | peanut           | ppc         | puff            | roll      |  |
| 0.32             | 0.32       | 0.32             | 0.32        | 0.32            | 0.32      |  |
| smoke            | stuf       | versus           | overal      | resembl         | provid    |  |
| 0.32             | 0.32       | 0.32             | 0.31        | 0.31            | 0.31      |  |
| lipid            | peanutbas  | term             | formul      | spread          | substanti |  |
| 0.31             | 0.31       | 0.30             | 0.30        | 0.30            | 0.30      |  |
| perform          | level      | aim              | pathway     | musti           | use       |  |
| 0.29             | 0.29       | 0.29             | 0.29        | 0.29            | 0.28      |  |
| addit            | beef       | best             | minc        | fri             | assess    |  |
| 0.28             | 0.28       | 0.28             | 0.28        | 0.28            | 0.27      |  |
| tsp              | base       | bit              | encapsul    | former          | liquid    |  |
| 0.27             | 0.27       | 0.27             | 0.27        | 0.27            | 0.27      |  |
| pocket           | qualit     | quantit          | though      | method          | scale     |  |
| 0.27             | 0.27       | 0.27             | 0.27        | 0.26            | 0.26      |  |
| success          | three      | show             | insight     |                 |           |  |
| 0.26             | 0.25       | 0.25             | 0.25        |                 |           |  |

|            |                 |                   |                |                |            |                 |
|------------|-----------------|-------------------|----------------|----------------|------------|-----------------|
| \$sensori  |                 |                   |                |                |            |                 |
| breslin    | keast           | evalu             | use            | bitter         | test       |                 |
| 0.46       | 0.46            | 0.45              | 0.41           | 0.41           | 0.39       |                 |
| assess     | properti        | mechan            | overall        | sampl          | howev      |                 |
| 0.39       | 0.38            | 0.38              | 0.37           | 0.37           | 0.37       |                 |
| descript   | tomato          | addit             | compar         | panelist       | analysi    |                 |
| 0.37       | 0.36            | 0.35              | 0.35           | 0.35           | 0.34       |                 |
| result     | base            | quantifi          | multidimension | control        | sensat     |                 |
| 0.34       | 0.34            | 0.34              | 0.34           | 0.33           | 0.33       |                 |
| sensit     | bakker          | busch             | clifford       | considin       | danguin    |                 |
| 0.33       | 0.33            | 0.33              | 0.33           | 0.33           | 0.33       |                 |
| delahunti  | heyman          | kallithraka       | kfchn          | neurophysiolog | pend       |                 |
| 0.33       | 0.33            | 0.33              | 0.33           | 0.33           | 0.33       |                 |
| precis     | prolong         | reitmeier         | sall           | septier        | singh      |                 |
| 0.33       | 0.33            | 0.33              | 0.33           | 0.33           | 0.33       |                 |
| thoma      | torrespenaranda | trice             | bajec          | bartoshuk      | bolhui     |                 |
| 0.33       | 0.33            | 0.33              | 0.33           | 0.33           | 0.33       |                 |
| capsaicin  | carney          | cessari           | chemesthet     | ciceral        | duffi      |                 |
| 0.33       | 0.33            | 0.33              | 0.33           | 0.33           | 0.33       |                 |
| file       | hansen          | hollowood         | hort           | iii            | irrit      |                 |
| 0.33       | 0.33            | 0.33              | 0.33           | 0.33           | 0.33       |                 |
| kidd       | lanier          | npropylthiouracil | picker         | pothesi        | proxi      |                 |
| 0.33       | 0.33            | 0.33              | 0.33           | 0.33           | 0.33       |                 |
| pungenc    | sociat          | swaincampbel      | taster         | wish           | wright     |                 |
| 0.33       | 0.33            | 0.33              | 0.33           | 0.33           | 0.33       |                 |
| product    | agent           | past              | dinehart       | method         | understand |                 |
| 0.32       | 0.32            | 0.32              | 0.32           | 0.31           | 0.31       |                 |
| oral       | percept         | character         | cognit         | persist        | cog        |                 |
| 0.31       | 0.31            | 0.31              | 0.30           | 0.30           | 0.30       |                 |
| fatigu     | guichard        | nitiv             | omit           | beetging       | analog     |                 |
| 0.30       | 0.30            | 0.30              | 0.30           | 0.30           | 0.29       |                 |
| attribut   | can             | research          | complex        | hay            | prescott   |                 |
| 0.29       | 0.29            | 0.29              | 0.29           | 0.29           | 0.29       |                 |
| instrument | score           | affect            | interest       | interact       | pathway    |                 |
| 0.28       | 0.28            | 0.28              | 0.28           | 0.28           | 0.28       |                 |
| combin     | differ          | beefbon           | unflavor       | liquid         | reed       |                 |
| 0.27       | 0.27            | 0.27              | 0.27           | 0.27           | 0.27       |                 |
| webb       | studi           | fullmeat          | mask           | physiolog      | lemonbasil |                 |
| 0.27       | 0.26            | 0.26              | 0.26           | 0.26           | 0.26       |                 |
| show       | limit           | better            | qualiti        | spi            | prop       |                 |
| 0.25       | 0.25            | 0.25              | 0.25           | 0.25           | 0.25       |                 |
| \$stextur  |                 |                   |                |                |            |                 |
| properti   | physiochem      | nugget            | analog         | use            | techniqu   | ratio           |
| 0.49       | 0.47            | 0.43              | 0.37           | 0.37           | 0.37       | 0.37            |
| analysi    | soy             | instrument        | howev          | optim          | emulsifi   | capabl          |
| 0.36       | 0.35            | 0.35              | 0.35           | 0.35           | 0.35       | 0.35            |
| judg       | microscopi      | scan              | yuliarti       | structur       | analogu    | form            |
| 0.35       | 0.35            | 0.35              | 0.35           | 0.34           | 0.34       | 0.33            |
| gum        | freez           | layer             | gluten         | develop        | show       | capac           |
| 0.33       | 0.33            | 0.33              | 0.32           | 0.31           | 0.31       | 0.31            |
| emuls      | fibrous         | ideal             | mouthfeel      | hydrocolloid   | icgn       | iotacarrageenan |
| 0.31       | 0.31            | 0.31              | 0.30           | 0.29           | 0.29       | 0.29            |
| analyt     | creation        | extrus            | soup           | composit       | test       | result          |
| 0.29       | 0.29            | 0.29              | 0.29           | 0.29           | 0.28       | 0.28            |
| anoth      | molecul         | wheat             | name           | crosslink      | desir      | term            |
| 0.28       | 0.28            | 0.28              | 0.28           | 0.28           | 0.27       | 0.27            |
| affect     | tv              | generat           | includ         | uniqu          | sausag     | sampl           |
| 0.27       | 0.27            | 0.27              | 0.27           | 0.27           | 0.27       | 0.26            |
| method     | control         | viscoelast        | thicken        | ppi            | gel        | synergist       |
| 0.26       | 0.26            | 0.26              | 0.26           | 0.26           | 0.26       | 0.26            |
| process    | commerci        |                   |                |                |            |                 |
| 0.25       | 0.25            |                   |                |                |            |                 |

|            |                  |              |              |                 |                  |          |           |
|------------|------------------|--------------|--------------|-----------------|------------------|----------|-----------|
| \$accept   |                  |              |              |                 |                  |          |           |
| vitro      | eat              | sourc        | dont         | belgium         | control          | sustain  | singlecel |
| 0.49       | 0.47             | 0.46         | 0.45         | 0.43            | 0.41             | 0.41     | 0.41      |
| seafoodbas | analog           | sampl        | studi        | influenc        | compar           | found    | specul    |
| 0.41       | 0.40             | 0.39         | 0.39         | 0.39            | 0.37             | 0.37     | 0.37      |
| particip   | meatbas          | know         | grasp        | salad           | student          | may      | score     |
| 0.35       | 0.35             | 0.35         | 0.35         | 0.35            | 0.35             | 0.34     | 0.34      |
| determin   | four             | without      | overall      | manner          | product          | show     | food      |
| 0.34       | 0.34             | 0.34         | 0.33         | 0.33            | 0.32             | 0.32     | 0.32      |
| choic      | meati            | result       | term         | scale           | extent           | adult    | surpris   |
| 0.32       | 0.32             | 0.31         | 0.31         | 0.31            | 0.31             | 0.31     | 0.30      |
| contain    | fullmeat         | although     | agreement    | analysi         | hedon            | perform  | provid    |
| 0.30       | 0.30             | 0.30         | 0.30         | 0.29            | 0.29             | 0.29     | 0.29      |
| enhanc     | smoke            | beefbon      | unflavor     | barrier         | liquid           | research | concept   |
| 0.29       | 0.29             | 0.29         | 0.29         | 0.29            | 0.29             | 0.29     | 0.29      |
| motiv      | older            | competit     | eventu       | healthpromot    | industryscal     | kilo     | lowcost   |
| 0.29       | 0.29             | 0.29         | 0.29         | 0.29            | 0.29             | 0.29     | 0.29      |
| owe        | singlecellbas    | slaughter    | transport    | vitrobas        | test             | addit    | adequ     |
| 0.29       | 0.29             | 0.29         | 0.29         | 0.29            | 0.28             | 0.28     | 0.28      |
| level      | conduct          | vegetablebas | environment  | price           | can              | colleagu | suggest   |
| 0.28       | 0.28             | 0.28         | 0.28         | 0.28            | 0.27             | 0.27     | 0.27      |
| altern     | spici            | agent        | use          | reveal          | affect           | explain  | spice     |
| 0.27       | 0.27             | 0.27         | 0.26         | 0.26            | 0.26             | 0.26     | 0.26      |
| descript   | unfamiliar       | previous     | visibl       | respond         |                  |          |           |
| 0.26       | 0.26             | 0.26         | 0.26         | 0.25            |                  |          |           |
| \$increas  |                  |              |              |                 |                  |          |           |
| decreas    | concentr         | mrp          | carotenoid   | sharimaabdullah | appear           | chickpea |           |
| 0.46       | 0.44             | 0.44         | 0.39         | 0.39            | 0.38             | 0.38     |           |
| fact       | flour            | due          | lowest       | addit           | world            | chang    |           |
| 0.34       | 0.33             | 0.32         | 0.32         | 0.29            | 0.29             | 0.28     |           |
| import     | score            | typ          | flavorenhanc | hydrolyz        | oppos            | moist    |           |
| 0.27       | 0.27             | 0.26         | 0.26         | 0.26            | 0.26             | 0.26     |           |
| led        | colorimetr       | erti         | mrps         | placement       | broken           | creas    |           |
| 0.26       | 0.26             | 0.26         | 0.26         | 0.26            | 0.26             | 0.26     |           |
| melton     | oliv             | polymer      | sds          | solubi          | solvent          | stanley  |           |
| 0.26       | 0.26             | 0.26         | 0.26         | 0.26            | 0.26             | 0.26     |           |
| teract     | twocompon        | watersolubl  | fabric       | hirata          | intact           | altern   |           |
| 0.26       | 0.26             | 0.26         | 0.26         | 0.26            | 0.26             | 0.25     |           |
| \$like     |                  |              |              |                 |                  |          |           |
| pasta      | pathway          | beetging     | credenc      | leav            | outstrip         |          |           |
| 0.61       | 0.47             | 0.42         | 0.42         | 0.42            | 0.42             |          |           |
| sound      | tomato           | lemonbasil   | conceptu     | mustyearthi     | ceptual          |          |           |
| 0.42       | 0.41             | 0.41         | 0.40         | 0.38            | 0.38             |          |           |
| compar     | experie          | overall      | cata         | met             | basil            |          |           |
| 0.33       | 0.32             | 0.31         | 0.30         | 0.30            | 0.30             |          |           |
| complement | cuellarbermfadez | foreseen     | geosmin      | glutam          | methylisoborneol |          |           |
| 0.30       | 0.30             | 0.30         | 0.30         | 0.30            | 0.30             |          |           |
| mib        | milovanoviucu    | propriat     | spirulinarel | steepest        | tsp              |          |           |
| 0.30       | 0.30             | 0.30         | 0.30         | 0.30            | 0.29             |          |           |
| negat      | higher           | mask         | bland        | netherland      | femal            |          |           |
| 0.29       | 0.27             | 0.27         | 0.27         | 0.27            | 0.27             |          |           |
| stand      |                  |              |              |                 |                  |          |           |
| 0.25       |                  |              |              |                 |                  |          |           |

|             |                   |               |              |              |            |            |              |
|-------------|-------------------|---------------|--------------|--------------|------------|------------|--------------|
| \$plantbas  |                   |               |              |              |            |            |              |
| composit    | impl              | makeup        | satisfactori | smallscal    | struc      | vestment   | nutrit       |
| 0.49        | 0.46              | 0.46          | 0.46         | 0.46         | 0.46       | 0.46       | 0.43         |
| freez       | nugget            | techniqu      | develop      | imposs       | diversif   | pietsch    | prevail      |
| 0.43        | 0.42              | 0.41          | 0.40         | 0.38         | 0.37       | 0.37       | 0.37         |
| rear        | round             | sur           | surround     | unsus        | mentat     | ppn        | substitut    |
| 0.37        | 0.37              | 0.37          | 0.37         | 0.37         | 0.37       | 0.37       | 0.36         |
| process     | structur          | mimic         | animalbas    | generat      | altern     | regular    | uniqu        |
| 0.34        | 0.34              | 0.34          | 0.33         | 0.32         | 0.32       | 0.32       | 0.32         |
| necessarili | home              | product       | littl        | issu         | meatlik    | analogu    | studi        |
| 0.32        | 0.32              | 0.31          | 0.31         | 0.31         | 0.31       | 0.30       | 0.29         |
| recent      | date              | ingredi       | strategi     | natur        | potenti    | constraint | rais         |
| 0.29        | 0.29              | 0.28          | 0.27         | 0.27         | 0.27       | 0.27       | 0.27         |
| use         | vari              | anim          | health       | everi        | insectsbas | stigma     | resourc      |
| 0.26        | 0.26              | 0.26          | 0.26         | 0.26         | 0.26       | 0.26       | 0.26         |
| envisag     | face              | terest        | uni          | vers         | dekker     | xiong      | amin         |
| 0.26        | 0.26              | 0.26          | 0.26         | 0.26         | 0.26       | 0.26       | 0.26         |
| barzegar    | berman            | carcinogen    | cheng        | dioxid       | excess     | jiang      | kamankesh    |
| 0.26        | 0.26              | 0.26          | 0.26         | 0.26         | 0.26       | 0.26       | 0.26         |
| khan        | kuhnl             | nadeem        | predispos    | preserv      | rahman     | sahar      | thylcellulos |
| 0.26        | 0.26              | 0.26          | 0.26         | 0.26         | 0.26       | 0.26       | 0.26         |
| titanium    | truli             | characterist  | includ       | conduct      | specif     | asia       | tainabl      |
| 0.26        | 0.26              | 0.25          | 0.25         | 0.25         | 0.25       | 0.25       | 0.25         |
| rheolog     |                   |               |              |              |            |            |              |
| 0.25        |                   |               |              |              |            |            |              |
| \$sexpect   |                   |               |              |              |            |            |              |
| assimil     | deliza            | macfi         | actual       | discrep      | predict    |            |              |
| 0.67        | 0.67              | 0.67          | 0.63         | 0.59         | 0.57       |            |              |
| dispar      | distast           | gativ         | kehkfne      | kole         | latitud    |            |              |
| 0.56        | 0.56              | 0.56          | 0.56         | 0.56         | 0.56       |            |              |
| mojet       | sawyer            | schifferstein | sect         | sensorylik   | wors       |            |              |
| 0.56        | 0.56              | 0.56          | 0.56         | 0.56         | 0.56       |            |              |
| disconfirm  | brain             | frog          | cardello     | contrast     | experi     |            |              |
| 0.55        | 0.55              | 0.55          | 0.51         | 0.43         | 0.43       |            |              |
| hypothet    | pectat            | unclear       | pasta        | chines       | magnif     |            |              |
| 0.43        | 0.43              | 0.43          | 0.40         | 0.39         | 0.39       |            |              |
| assimila    | chil              | chocol        | contradict   | dren         | feedback   |            |              |
| 0.39        | 0.39              | 0.39          | 0.39         | 0.39         | 0.39       |            |              |
| posur       | pothet            | spons         | switch       | tioncontrast | upward     |            |              |
| 0.39        | 0.39              | 0.39          | 0.39         | 0.39         | 0.39       |            |              |
| pathway     | expectationexperi | lamb          | adjust       | neo          | phobia     |            |              |
| 0.38        | 0.37              | 0.36          | 0.35         | 0.35         | 0.35       |            |              |
| disappoint  | familiar          | credenc       | leav         | outstrip     | sound      |            |              |
| 0.35        | 0.33              | 0.33          | 0.33         | 0.33         | 0.33       |            |              |
| presum      | effect            | thus          | perform      | german       | now        |            |              |
| 0.32        | 0.31              | 0.31          | 0.31         | 0.31         | 0.31       |            |              |
| novel       | crosscultur       | food          | reject       | tan          | ceptual    |            |              |
| 0.30        | 0.30              | 0.29          | 0.29         | 0.29         | 0.29       |            |              |
| lead        | predictor         | gap           | fischer      | stieger      | small      |            |              |
| 0.28        | 0.28              | 0.28          | 0.28         | 0.28         | 0.27       |            |              |
| model       | palat             | enc           | tuorila      | postul       | irrespect  |            |              |
| 0.27        | 0.27              | 0.27          | 0.27         | 0.27         | 0.27       |            |              |
| somewhat    | trast             | obvious       | conceptu     | met          | dutch      |            |              |
| 0.27        | 0.27              | 0.27          | 0.27         | 0.27         | 0.26       |            |              |
| resist      | via               |               |              |              |            |            |              |
| 0.25        | 0.25              |               |              |              |            |            |              |

|                    |                   |                |             |                  |            |                 |            |             |
|--------------------|-------------------|----------------|-------------|------------------|------------|-----------------|------------|-------------|
| \$pea              |                   |                |             |                  |            |                 |            |             |
| starchi            | lupin             | grain          | chamber     | broth            | bott       | defi            | mushroomi  | nition      |
| 0.54               | 0.54              | 0.53           | 0.53        | 0.53             | 0.52       | 0.51            | 0.51       | 0.51        |
| ope                | ubol              | vara           | varaubol    | astring          | powderi    | dusti           | green      | definit     |
| 0.51               | 0.51              | 0.51           | 0.51        | 0.50             | 0.50       | 0.49            | 0.45       | 0.44        |
| beani              | pod               | nut            | earthi      | fvalu            | resp       | spectiv         | attribut   | crimin      |
| 0.42               | 0.41              | 0.40           | 0.38        | 0.38             | 0.38       | 0.38            | 0.37       | 0.37        |
| tribut             | attri             | bute           | almond      | newmankeul       | solut      | bitter          | puls       | australia   |
| 0.36               | 0.36              | 0.36           | 0.36        | 0.36             | 0.35       | 0.34            | 0.33       | 0.32        |
| canada             | cholesterol       | fortif         | manag       | repair           | satieti    | sportmind       | usa        | musti       |
| 0.32               | 0.32              | 0.32           | 0.32        | 0.32             | 0.32       | 0.32            | 0.32       | 0.32        |
| describ            | protocol          | block          | discrimin   | among            | phenol     | display         | devel      | dimension   |
| 0.31               | 0.31              | 0.31           | 0.30        | 0.29             | 0.29       | 0.29            | 0.29       | 0.29        |
| multi              | panelist          | classic        | consist     | degre            | launch     | six             | alum       | granular    |
| 0.29               | 0.28              | 0.28           | 0.27        | 0.27             | 0.27       | 0.27            | 0.27       | 0.27        |
| threeway           | nutti             | manufactur     | hay         | ambigu           | arcot      | brothi          | chandrahio | drake       |
| 0.27               | 0.26              | 0.26           | 0.26        | 0.26             | 0.26       | 0.26            | 0.26       | 0.26        |
| ejszo              | kaczmarska        | litera         | lopetcharat | malcolmsen       | pars       | ska             | soil       | szymkiewicz |
| 0.26               | 0.26              | 0.26           | 0.26        | 0.26             | 0.26       | 0.26            | 0.26       | 0.26        |
| troszyucu          | woodi             | wou            | sour        |                  |            |                 |            |             |
| 0.26               | 0.26              | 0.26           | 0.25        |                  |            |                 |            |             |
| \$spirulina        |                   |                |             |                  |            |                 |            |             |
| lemonbasil         | mustyearthi       | mask           |             | pasta            | lemon      | though          |            |             |
| 0.64               | 0.61              | 0.54           |             | 0.53             | 0.49       | 0.48            |            |             |
| spirulinasoyextrud | promis            | biomass        |             | beetging         | content    | extrud          |            |             |
| 0.48               | 0.47              | 0.47           |             | 0.44             | 0.43       | 0.43            |            |             |
| tomato             | peratur           | tem            |             | grahl            | fill       | futur           |            |             |
| 0.43               | 0.42              | 0.42           |             | 0.42             | 0.42       | 0.39            |            |             |
| turn               | step              | expenditur     |             | ject             | someth     | stood           |            |             |
| 0.39               | 0.39              | 0.39           |             | 0.39             | 0.39       | 0.39            |            |             |
| usag               | basil             | complement     |             | cuellarbermfadez | foreseen   | geosmin         |            |             |
| 0.39               | 0.39              | 0.39           |             | 0.39             | 0.39       | 0.39            |            |             |
| glutam             | methyilisoborneol | mib            |             | milovanoviucu    | propriat   | spirulinaarel   |            |             |
| 0.39               | 0.39              | 0.39           |             | 0.39             | 0.39       | 0.39            |            |             |
| steepest           | bao               | foundat        |             | intensif         | ren        | zheng           |            |             |
| 0.39               | 0.39              | 0.39           |             | 0.39             | 0.39       | 0.39            |            |             |
| take               | microalga         | even           |             | part             | pathway    | firm            |            |             |
| 0.38               | 0.37              | 0.37           |             | 0.36             | 0.36       | 0.34            |            |             |
| earthi             | intens            | serv           |             | musti            | confound   | contentflavor   |            |             |
| 0.34               | 0.33              | 0.33           |             | 0.33             | 0.33       | 0.33            |            |             |
| dim                | equidist          | nonlinear      |             | smallest         | spir       | spirulinaextrud |            |             |
| 0.33               | 0.33              | 0.33           |             | 0.33             | 0.33       | 0.33            |            |             |
| tens               | ulina             | input          |             | justifi          | netherland | insight         |            |             |
| 0.33               | 0.33              | 0.32           |             | 0.32             | 0.32       | 0.30            |            |             |
| palanisami         | account           | still          |             | gain             | investig   | goal            |            |             |
| 0.29               | 0.29              | 0.29           |             | 0.29             | 0.28       | 0.28            |            |             |
| standalon          | share             | deep           |             | screw            | speed      | entir           |            |             |
| 0.28               | 0.28              | 0.28           |             | 0.28             | 0.28       | 0.28            |            |             |
| soon               | sus               | preprocess     |             | need             | left       | conceptu        |            |             |
| 0.28               | 0.28              | 0.28           |             | 0.27             | 0.27       | 0.27            |            |             |
| odor               | small             | energi         |             | accord           | experienc  | impli           |            |             |
| 0.26               | 0.26              | 0.26           |             | 0.26             | 0.26       | 0.26            |            |             |
| key                | adjust            | pronounc       |             | acolor           | alga       | foveral         |            |             |
| 0.26               | 0.26              | 0.26           |             | 0.26             | 0.26       | 0.26            |            |             |
| influenti          | omusti            | beheshtipour   |             | central          | clt        | flavorflavor    |            |             |
| 0.26               | 0.26              | 0.26           |             | 0.26             | 0.26       | 0.26            |            |             |
| franc              | gould             | khosravidarani |             | learn            | leitch     | mobini          |            |             |
| 0.26               | 0.26              | 0.26           |             | 0.26             | 0.26       | 0.26            |            |             |
| mortazavian        | sohrabvandi       | yeoman         |             | mere             |            |                 |            |             |
| 0.26               | 0.26              | 0.26           |             | 0.26             |            |                 |            |             |

|          |                |           |               |          |              |           |            |
|----------|----------------|-----------|---------------|----------|--------------|-----------|------------|
| \$posit  |                |           |               |          |              |           |            |
| rate     | familiar       | present   | contrast      | meal     | famil        | iariti    | intro      |
| 0.41     | 0.39           | 0.39      | 0.39          | 0.36     | 0.36         | 0.36      | 0.36       |
| posi     | rule           | may       | product       | ethic    | multisensori | apprais   | pectat     |
| 0.36     | 0.36           | 0.35      | 0.34          | 0.33     | 0.32         | 0.32      | 0.32       |
| wtt      | particip       | context   | rich          | negat    | individu     | correl    | ground     |
| 0.32     | 0.31           | 0.31      | 0.31          | 0.29     | 0.29         | 0.28      | 0.28       |
| expens   | actual         | assimil   | deliza        | macfi    | perceiv      | food      | novel      |
| 0.28     | 0.28           | 0.28      | 0.28          | 0.28     | 0.27         | 0.27      | 0.27       |
| corr     | iness          | tiness    | dispar        | distast  | gativ        | kehkfnen  | kole       |
| 0.27     | 0.27           | 0.27      | 0.27          | 0.27     | 0.27         | 0.27      | 0.27       |
| latitud  | mojet          | sawyer    | schifferstein | sect     | sensorylik   | wors      | are        |
| 0.27     | 0.27           | 0.27      | 0.27          | 0.27     | 0.27         | 0.27      | 0.27       |
| gembaro  | provi          | these     | verain        | cracker  | shake        | hous      | disconfirm |
| 0.27     | 0.27           | 0.27      | 0.27          | 0.27     | 0.27         | 0.26      | 0.25       |
| chip     | late           | grown     | basi          | decid    | duce         | lose      | hypothet   |
| 0.25     | 0.25           | 0.25      | 0.25          | 0.25     | 0.25         | 0.25      | 0.25       |
| unclear  | contact        | est       | exceed        |          |              |           |            |
| 0.25     | 0.25           | 0.25      | 0.25          |          |              |           |            |
| \$plant  |                |           |               |          |              |           |            |
| hydrolys | success        | use       | meatlik       | muscl    | nutrit       | structur  |            |
| 0.39     | 0.38           | 0.36      | 0.36          | 0.35     | 0.34         | 0.34      |            |
| composit | hardacr        | parker    | bean          | improv   | chand        | cooker    |            |
| 0.33     | 0.33           | 0.33      | 0.32          | 0.31     | 0.31         | 0.31      |            |
| eyr      | gokulakrishnan | malav     | ribos         | silcock  | talukd       | tasteless |            |
| 0.31     | 0.31           | 0.31      | 0.31          | 0.31     | 0.31         | 0.31      |            |
| form     | loss           | techniqu  | select        | chiang   | freez        | impl      |            |
| 0.30     | 0.30           | 0.29      | 0.29          | 0.29     | 0.29         | 0.29      |            |
| makeup   | satisfactori   | smallscal | struc         | vestment | loveday      | vari      |            |
| 0.29     | 0.29           | 0.29      | 0.29          | 0.29     | 0.29         | 0.28      |            |
| aim      | develop        | bone      | maillardreact | challeng | date         | analogu   |            |
| 0.28     | 0.27           | 0.27      | 0.27          | 0.27     | 0.27         | 0.27      |            |
| ppn      | waterbind      | product   | materi        |          |              |           |            |
| 0.27     | 0.27           | 0.26      | 0.26          |          |              |           |            |
